1 **Individual kinetochore-fibers locally dissipate force to maintain robust**  
2 **mammalian spindle structure**

3

4 Alexandra F. Long<sup>1,3+</sup>, Pooja Suresh<sup>2,3</sup>, Sophie Dumont<sup>1-3+</sup>

5 <sup>1</sup>Tetrad Graduate Program, <sup>2</sup>Biophysics Graduate Program, <sup>3</sup>Department of Cell and  
6 Tissue Biology, University of California, San Francisco, <sup>+</sup>corresponding author

7

8 Corresponding authors:

9 Sophie Dumont (sophie.dumont@ucsf.edu)

10 Alexandra Long (a.fitz.long@gmail.com)

11

12 **Abstract**

13

14 At cell division, the mammalian kinetochore binds many spindle microtubules that make  
15 up the kinetochore-fiber. To segregate chromosomes, the kinetochore-fiber must be  
16 dynamic and generate and respond to force. Yet, how it remodels under force remains  
17 poorly understood. Kinetochore-fibers cannot be reconstituted *in vitro*, and exerting  
18 controlled forces *in vivo* remains challenging. Here, we use microneedles to pull on  
19 mammalian kinetochore-fibers and probe how sustained force regulates their dynamics  
20 and structure. We show that force lengthens kinetochore-fibers by persistently favoring  
21 plus-end polymerization, not by increasing polymerization rate. We demonstrate that  
22 force suppresses depolymerization at both plus- and minus-ends, rather than sliding  
23 microtubules within the kinetochore-fiber. Finally, we observe that kinetochore-fibers  
24 break but do not detach from kinetochores or poles. Together, this work suggests an  
25 engineering principle for spindle structural homeostasis: different physical mechanisms  
26 of local force dissipation by the k-fiber limit force transmission to preserve robust spindle  
27 structure. These findings may inform how other dynamic, force-generating cellular  
28 machines achieve mechanical robustness.

29

## 30 **Introduction**

31

32 The spindle segregates chromosomes at cell division, and must do so accurately and  
33 robustly for proper cell and tissue function. In mammalian spindles, bundles of 15-25  
34 microtubules called kinetochore-fibers (k-fibers) span from the kinetochore at their plus-  
35 ends to the spindle pole at their minus-ends (Rieder, 1981; McDonald et al., 1992;  
36 McEwen et al., 1997). K-fibers are dynamic at both ends (Mitchison, 1989; Cassimeris  
37 and Salmon, 1991), and we now have a wealth of information on the molecular  
38 regulation of their dynamics (Cheeseman and Desai, 2008; Bakhom and Compton,  
39 2012; Monda and Cheeseman, 2018). To move chromosomes, k-fibers generate force  
40 through plus-end depolymerization (Koshland et al., 1988; Grishchuk et al., 2005;  
41 Mitchison et al., 1986). Yet, while we are beginning to understand how the mammalian  
42 k-fiber generates force (Inoué and Salmon, 1995; Grishchuk, 2017), we know much less  
43 about how force from the k-fiber and surrounding spindle in turn affects k-fiber structure  
44 and dynamics. Defining this relationship between k-fibers and their mechanical  
45 environment is central to understanding spindle structural homeostasis and function.

46 Force affects microtubule dynamics and structure in a variety of contexts  
47 (Dogterom et al., 2005). From *in vitro* experiments coupling single microtubules to yeast  
48 kinetochore particles, we know that force can regulate all four parameters of  
49 microtubule dynamic instability (Akiyoshi et al., 2010; Sarangapani et al., 2013): it  
50 increases polymerization rates while slowing depolymerization, and favors rescue over  
51 catastrophe. From *in vivo* experiments, we know that force exerted by the cell correlates  
52 with changes in mammalian k-fiber dynamics (Wan et al., 2012; Dumont et al., 2012;

53 Auckland et al., 2017), and that reducing and increasing force can bias k-fiber dynamics  
54 in different systems (Nicklas and Staehly, 1967; Skibbens et al., 1995; Khodjakov and  
55 Rieder, 1996; Skibbens and Salmon, 1997; Long et al., 2017). However, the feedback  
56 between force, structure and dynamics in the mammalian k-fiber remains poorly  
57 understood. For example, we do not know which dynamic instability parameters are  
58 regulated by force, or at which microtubule end. Similarly, we do not know how  
59 microtubules within the k-fiber remodel their structure (e.g. slide or break) under force,  
60 or the physical limits of the connections between k-fibers and the spindle. These  
61 questions are at the heart of understanding how the spindle can maintain its structure  
62 given its dynamic, force-generating parts (Oriola et al., 2018; Elting et al., 2018).  
63 Addressing these questions requires the ability to apply force on k-fibers with spatial  
64 and temporal control, while concurrently imaging their dynamics. Yet, exerting controlled  
65 forces in dividing mammalian cells remains a challenge, and mammalian spindles and  
66 k-fibers cannot currently be reconstituted *in vitro*. Chemical and genetic perturbations  
67 can change forces on k-fibers *in vivo*, but these alter microtubule structure or dynamics,  
68 either directly or indirectly through regulatory proteins (De Brabander et al., 1986;  
69 Vladimirou et al., 2013; Alushin et al., 2014). Thus, direct mechanical approaches are  
70 needed inside mammalian cells.

71         Here, we use glass microneedles to directly exert force on individual k-fibers  
72 inside mammalian cells and determine how their structure and dynamics remodel under  
73 sustained force. Inspired by experiments in insect spermatocytes (Nicklas and Staehly,  
74 1967; Nicklas, 1997; Lin et al., 2018), we sought to adapt microneedle manipulation to  
75 pull on k-fibers in mitotic mammalian cells for many minutes while monitoring their

76 dynamics with fluorescence imaging. We show that forces applied for minutes regulate  
77 k-fiber dynamics at both ends, causing k-fiber lengthening, but do not cause sliding of  
78 the microtubules within them. Further, we demonstrate that sustained forces can break  
79 k-fibers rather than detach them from kinetochores or poles. Thus, k-fibers respond as a  
80 coordinated mechanical unit – remodeling at different sites to locally dissipate force,  
81 while preserving the connections between chromosomes and the spindle. Together,  
82 these findings suggest local force dissipation as an engineering principle for the  
83 dynamic spindle to maintain its structure and function under force and for other cellular  
84 machines to do the same.

85

## 86 **Results**

87

88 *Microneedle manipulation of mammalian spindles enables sustained force application*  
89 *on k-fibers with spatial and temporal control*

90

91 To determine how mammalian k-fibers remodel under force, we sought an approach to  
92 apply forces with spatial and temporal control for sustained periods, compatible with cell  
93 health and live imaging of structure and dynamics. We adapted microneedle  
94 manipulation to pull on individual k-fibers in mammalian cells (Fig. 1A) and developed  
95 methods to do so gently enough to exert force for several minutes (Suresh et al., 2019).  
96 We used PtK cells as these are large and flat, have few chromosomes which allows us  
97 to pull on individual k-fibers, and are molecularly tractable (Udy et al., 2015). We used a  
98 micromanipulator and a fluorescently labeled glass microneedle to contact a target

99 metaphase PtK cell. We used microneedles with a diameter of  $1.2 \pm 0.1 \mu\text{m}$  in the z-  
100 plane of the k-fiber. Pulling on an outermost k-fiber in the spindle for several minutes,  
101 we could reproducibly exert controlled forces, moving the microneedle with specific  
102 velocities over any given duration (Fig. 1B) and direction. The microneedle only locally  
103 deformed the cell membrane and spindle and remained outside of the cell, allowing  
104 precise, local control of where force is applied (Fig. 1C) (Suresh et al., 2019). Upon  
105 careful removal of the microneedle, cells typically entered anaphase (Fig. 1D). These  
106 observations are consistent with cell health maintenance during these sustained  
107 manipulations. Thus, we can use microneedle manipulation to exert forces with spatial  
108 and temporal control over minutes on a mammalian k-fiber, and thereby probe how  
109 force regulates k-fiber structure and dynamics.

110

111 *Individual mammalian k-fibers switch to persistent lengthening in response to sustained*  
112 *applied force*

113

114 To probe the response of k-fibers to force, we placed the microneedle along the k-fiber,  
115 within a few microns of the outermost sister kinetochore pair (Fig. 2A,B). We moved the  
116 microneedle at a speed of  $5.2 \pm 0.2 \mu\text{m}/\text{min}$  for  $3.1 \pm 0.3 \text{ min}$  (Fig. 1B), perpendicular to  
117 the spindle's long axis at the start of manipulation. We predicted that in response to  
118 force from the microneedle the spindle would either locally or globally deform (Fig. 2A).  
119 In response to this perturbation, the spindle translated and rotated, with faster  
120 microneedle speeds giving rise to faster spindle speeds (Fig. 2C,D). Thus we see global  
121 movement of the spindle in response to force. Yet, in these same spindles we also

122 observed that k-fibers lengthened, indicating that the spindle also locally responds to  
123 force (Fig. 2E). During the pull, the manipulated k-fiber bent and lengthened by  $4.1 \pm 0.8$   
124  $\mu\text{m}$ ; meanwhile, an unmanipulated k-fiber in the same spindle half lengthened  
125 significantly less over the same duration (net k-fiber growth  $0.03 \pm 0.32 \mu\text{m}$ , Mann-  
126 Whitney U test,  $p = 6 \times 10^{-5}$ , Fig. 2F). Thus, force is dissipated locally by k-fiber bending  
127 and lengthening, and globally by whole spindle movements.

128         The manipulated k-fiber grew at  $1.6 \pm 0.3 \mu\text{m}/\text{min}$ , which was not significantly  
129 faster than its neighboring unmanipulated k-fiber during the growth phases of its  
130 oscillations ( $1.4 \pm 0.1 \mu\text{m}/\text{min}$ , Mann-Whitney U test,  $p = 0.98$ , Fig. 2G). However, the  
131 manipulated k-fiber persistently lengthened (Fig. 2E), with either undetectable or very  
132 transient shortening, for longer than typical metaphase oscillations (Wan et al., 2012;  
133 Civelekoglu-Scholey et al., 2013). There was no correlation between k-fiber growth rate  
134 and pulling speed (Fig. 2H), suggesting either that force was dissipated before reaching  
135 the k-fiber's ends or that force does not regulate its maximum growth rate (Nicklas,  
136 1983, 1988; Skibbens and Salmon, 1997; Betterton and McIntosh, 2013). Further, the k-  
137 fiber growth rate did not vary with the proximity of the microneedle to the plus-end  
138 (Spearman R coefficient = 0.08,  $p = 0.76$ , Fig. 2I), which we hypothesized would lead to  
139 more direct force transmission, consistent with force not regulating the k-fiber's  
140 maximum growth rate. Together, these findings indicate that individual k-fibers remodel  
141 under sustained force for minutes by persistently lengthening. They also suggest that  
142 force inhibits their normal switching dynamics rather than substantially increasing their  
143 growth rate, which may serve as a protective mechanism to limit the rate of spindle  
144 deformations and thereby preserve spindle structure.

145

146 *Force on individual mammalian k-fibers suppresses depolymerization at both ends*

147 *without altering plus-end polymerization rates or inducing microtubule sliding*

148

149 Metaphase mammalian k-fibers typically depolymerize at their minus-ends, and switch  
150 between polymerizing and depolymerizing at their plus-ends. Thus, force could lengthen  
151 k-fibers by increasing plus-end polymerization rates, by suppressing depolymerization  
152 at either end, by sliding microtubules within the k-fiber (Fig. 3A), or by a combination of  
153 these. To determine the physical mechanism of k-fiber lengthening under sustained  
154 force, we photomarked PA-GFP-tubulin on a k-fiber before micromanipulation and  
155 tracked the photomark's position and size within the k-fiber (co-labeled with SiR-tubulin)  
156 (Fig. 3B) over time. In unmanipulated cells, photomarks fluxed towards the pole at a  
157 constant rate that reports on depolymerization at the minus-end (Fig. 3C) (Mitchison,  
158 1989). Upon external force from the microneedle, the photomark to pole distance  
159 remained constant (Fig. 3D), while the photomark to plus-end distance increased (Fig.  
160 3E). This response indicates that applied force suppresses microtubule  
161 depolymerization at k-fiber minus-ends and that k-fibers lengthen by sustained  
162 polymerization at plus-ends.

163 Mapping these findings to the previous experiment measuring k-fiber lengthening  
164 (Fig. 2E,G), in the subset of k-fibers that lengthened (15/18), the growth rate was  $1.9 \pm$   
165  $0.4 \mu\text{m}/\text{min}$ , which is the rate of plus-end polymerization given that depolymerization at  
166 both ends is inhibited (Fig. 3D,E). This is similar to the plus-end polymerization rate of  
167 neighboring unmanipulated k-fibers during natural growth: lengthening at  $1.4 \pm 0.1$

168  $\mu\text{m}/\text{min}$  (Fig. 2G) while depolymerizing at the minus-end at  $\sim 0.5 \mu\text{m}/\text{min}$  results in a  
169 polymerization rate of  $\sim 1.9 \mu\text{m}/\text{min}$  at plus-ends (Mann-Whitney U test,  $p = 0.55$ ) (Long  
170 et al., 2017). This indicates that the applied force does not increase mammalian k-fiber  
171 plus-end polymerization rates.

172 Notably, the average width of the photomark remained constant during  
173 manipulation (Fig. 3F,G), indicating the microtubules do not detectably slide within the  
174 bundle. Thus, the k-fiber behaves as a single coordinated mechanical unit, rather than  
175 as microtubules that independently respond to force. Together, our findings indicate that  
176 individual k-fibers lengthen under force by remodeling their ends, and not their bundle  
177 structure: force suppresses depolymerization locally at both plus- and minus-ends (Fig.  
178 3), leads to persistent plus-end polymerization at a force-independent rate (Fig. 2,3),  
179 and does so with the k-fiber responding as a single mechanical unit (Fig. 3). Thus, force  
180 is dissipated locally at k-fiber ends. This may limit force transmission to the rest of the  
181 spindle, thereby preserving overall k-fiber and spindle architecture for proper  
182 chromosome segregation.

183

184 *The interfaces between mammalian k-fibers and the kinetochore and pole are more*  
185 *robust than k-fiber bundles under sustained force*

186

187 Finally, we asked how k-fiber structure and spindle connections changed over the  $\sim 5$ - $7$   
188 min lifetime of its microtubules (Gorbsky and Borisy, 1989; Cassimeris et al., 1990; Zhai  
189 et al., 1995), since this could set a timescale for their response to force. We  
190 hypothesized that as microtubules turn over the manipulated k-fiber could, for example,



191 detach from the spindle or break (Fig. 4A). We used microneedles to pull on k-fibers for  
192 several minutes. Over these sustained pulls, we never observed k-fiber detachment  
193 from the kinetochore or pole, indicating strong anchorage at those force-dissipating  
194 sites (Nicklas and Staehly, 1967; Begg and Ellis, 1979; Nicklas et al., 1982; Gatlin et al.,  
195 2010; Fong et al., 2017). Instead, k-fibers bent, lengthened, and then occasionally  
196 broke,  $3.7 \pm 0.5$  min after the start of pulling (Fig. 4B). To probe the mechanism of this  
197 breakage, we examined k-fiber structure over time and the kinetics of breakage. K-  
198 fibers that broke sustained high curvature for many minutes before breaking (Fig. 4C),  
199 and reached a maximum curvature similar to those that did not ( $p = 0.25$  Mann-Whitney  
200 U test, Fig. 4D). Further, k-fiber breakage kinetics appeared independent of the specific  
201 manner in which forces are exerted on the k-fiber: the time to breakage was similar  
202 when we moved the microneedle for a shorter time and held it in place, or pulled  
203 continuously for the entire duration of manipulation (Fig. 1B, 4E). Together, these  
204 suggested that the breakage process occurred gradually over sustained force, rather  
205 than rapidly by reaching an acute mechanical limit of k-fiber bending (Nicklas et al.,  
206 1989; Gittes et al., 1993; Ward et al., 2014; Schaedel et al., 2015). A k-fiber damage  
207 process that is gradual would promote breakage in response to sustained but not  
208 transient forces, setting a limiting timescale for restoring spindle structural homeostasis.

209 A possible model for gradual damage of the k-fiber over minutes is loss of  
210 microtubules as they turn over and fail to replenish within the k-fiber. In addition to  
211 turnover, it is also possible that there are alterations to k-fiber microtubule structure that  
212 would lead to gradual damage. During these manipulations, we observe microtubule  
213 plus-ends that appear to 'splay' from the bundle near the needle in 80% of k-fibers

214 before breakage (Fig 4B,F), and when we can track plus-ends after breakage, they fail  
215 to depolymerize (Fig 4G). This is in contrast to abruptly created k-fiber plus-ends which  
216 depolymerize within seconds (Spurck et al., 1990; Sikirzhytski et al., 2014; Elting et al.,  
217 2014) and suggests a change in local microtubule structure prior to breakage that  
218 stabilizes plus-ends at the breakage site (Schaedel et al., 2015; Portran et al., 2017;  
219 Vemu et al., 2018; McNally and Roll-Mecak, 2018; Gasic and Mitchison, 2019).  
220 Together, these findings show how mammalian k-fibers gradually respond to and  
221 dissipate sustained forces over their microtubule's lifetime. They robustly remain  
222 attached at kinetochores, yet eventually they locally break in the middle of the bundle,  
223 thereby preserving connections of chromosomes to the spindle at the expense of non-  
224 essential direct connections to poles (Sikirzhytski et al., 2014; Elting et al., 2014).

225

## 226 **Discussion**

227

228 In mammals, chromosome segregation is powered by dynamic k-fibers that both  
229 generate and respond to force. Here, we use microneedle manipulation to directly probe  
230 how k-fiber dynamics and structure respond to sustained force (Fig. 1). We thereby  
231 define how the spindle's longest-lived microtubule structure (Gorbsky and Borisy, 1989;  
232 Cassimeris et al., 1990; Zhai et al., 1995) remodels under force, which is key for  
233 understanding spindle structural homeostasis. We find that individual k-fibers respond to  
234 and dissipate sustained force by locally turning off microtubule depolymerization at both  
235 plus- and minus-ends (Fig. 2, 3), and eventually breaking on the timescale of their  
236 microtubule turnover (Fig. 4). They do so without increasing their rate of plus-end

237 polymerization (Fig. 2,3), without sliding their microtubules within the k-fiber (Fig. 2,3)  
238 and without detaching from kinetochores or poles (Fig. 4). Thus, how the k-fiber  
239 responds – and doesn't respond – to force allows it to act as a single mechanical unit  
240 that can maintain its connections to chromosomes and preserve global spindle  
241 structure. The ability to directly exert force on the mammalian spindle is key to this work  
242 as it allowed us to clearly probe the feedback between force, structure, and dynamics in  
243 the spindle (Elting et al., 2018). Together, these findings suggest different physical  
244 mechanisms of local force dissipation as an engineering principle for the spindle to  
245 maintain its structure and function under sustained forces (Fig. 5). More broadly, this  
246 study provides a framework for understanding how the spindle remodels under force  
247 during chromosome segregation.

248         We show that mammalian k-fiber plus-ends persistently polymerize at normal  
249 rates in response to applied force (Fig. 2,3). In contrast, microtubules attached to yeast  
250 kinetochore particles *in vitro* polymerize faster at higher force, in addition to suppressing  
251 catastrophe and favoring rescue under force (Franck et al., 2007; Akiyoshi et al., 2010).  
252 In newt cells, force induces persistent k-fiber lengthening at normal k-fiber growth rates  
253 (Skibbens and Salmon, 1997), and our findings suggest that this may occur through  
254 regulation of dynamics at both ends. The different force-velocity relationships at  
255 kinetochore-microtubule plus-ends in mammals and yeast kinetochore particles could,  
256 for example, stem from differences in applied forces, kinetochore architecture (Long et  
257 al., 2019), or additional regulation in cells. The molecular basis of potential “governors”  
258 of k-fiber plus-end polymerization velocity has been a long standing question (Nicklas,  
259 1983; Betterton and McIntosh, 2013; Long et al., 2017), and our findings suggest that in

260 mammals this molecular “governor” is not mechanically regulated. Notably, force not  
261 regulating mammalian k-fiber polymerization velocity (Fig. 2,3) could provide a  
262 protective upper limit to how fast the spindle can remodel. It also has implications for  
263 mechanical communication in the spindle, for example how force regulates kinetochore-  
264 microtubule attachments (Li and Nicklas, 1995; Sarangapani and Asbury, 2014).

265 We demonstrate that force not only regulates the dynamics of individual k-fibers’  
266 plus-ends, but also of their minus-ends (Fig. 3). Thus, both k-fiber ends serve as sites of  
267 force dissipation, allowing forces exerted on k-fibers to be locally and robustly  
268 dissipated, thereby limiting disruption to the rest of the spindle. The fact that force  
269 regulates minus-end dynamics of single k-fibers indicates that their regulation occurs at  
270 the level of the individual k-fiber, and not globally as hypothesized when force was  
271 applied to the whole spindle (Dumont and Mitchison, 2009; Guild et al., 2017). Though  
272 we cannot exclude it, we did not detect force-induced polymerization at k-fiber minus-  
273 ends, and thus force dissipation also appears limited at minus-ends. The microneedle  
274 approach we present here, combined with perturbations of microtubule regulators at  
275 minus-ends (Ganem et al., 2005; Ganem and Compton, 2006), will be key in defining  
276 the molecular basis of the regulation of k-fiber minus-end dynamics by force. Together,  
277 the response of individual k-fibers’ dynamics to force, at both ends, allows each k-fiber  
278 to locally isolate and dissipate applied force while retaining its internal organization and  
279 global spindle structure. Therefore k-fiber end dynamics mechanically buffer global  
280 spindle deformations from local forces to maintain structural homeostasis (Maddox et  
281 al., 2003; Matos et al., 2009).

282           On longer timescales, we find that the k-fiber breaks under force, without  
283   detaching from the kinetochore or pole (Fig. 4). This is surprising as force-induced  
284   detachments from kinetochores occur *in vitro* (Akiyoshi et al., 2010) and in meiotic  
285   insect cells (Nicklas, 1967; Nicklas and Koch, 1969; Paliulis and Nicklas, 2004; Lin et  
286   al., 2018). This difference could, for example, arise from variations in force application,  
287   or in the physical properties or architectures of their kinetochores (Cheerambathur et al.,  
288   2017; Auckland et al., 2017; Agarwal et al., 2018; Yoo et al., 2018). Instead of  
289   detaching, the k-fiber breaks on a timescale similar to that of its microtubule lifetime,  
290   suggesting that the k-fiber's lifetime may limit the long-term impact force can have over  
291   spindle structure. Our findings suggest a model of gradual k-fiber damage, and that  
292   sustained force may not only regulate biochemistry at the k-fiber's ends, but also in its  
293   middle along the microtubule lattice (Fig. 4F,G). Local defects in the lattice can  
294   replenish GTP-tubulin, creating stable sites for microtubule repair or enzymatic activities  
295   that may alter the physical properties of microtubules (Schaedel et al., 2015; Portran et  
296   al., 2017; Vemu et al., 2018; McNally and Roll-Mecak, 2018; Gasic and Mitchison,  
297   2019). Under sustained force, k-fiber attachments to chromosomes are prioritized over  
298   direct connections between chromosomes and poles, which are not necessary for  
299   segregation (Elting et al., 2014; Sikirzhytski et al., 2014) and thus may not be key for  
300   function.

301           Altogether, we show that mammalian spindles locally dissipate sustained force  
302   by remodeling k-fiber dynamics and structure through different physical mechanisms  
303   over time (Fig. 5). In principle, this can allow the spindle to preserve robust connections  
304   to chromosomes, and maintain its structure under force throughout mitosis. Local

305 dissipation of force limits its impact on the rest of the spindle, providing local isolation. In  
306 turn, the timescale of such dissipation limits the timescale of mechanical memory in the  
307 spindle. By regulating force dissipation, the spindle could set the impact force has on its  
308 structure over time to allow it to respond to different mechanical cues and perform  
309 different mechanical functions. Looking forward, it will be of interest to map how  
310 spindles with different k-fiber dynamics and structures across species dissipate and  
311 transmit force, and thereby preserve their structural homeostasis (Nicklas and Staehly,  
312 1967; Shimamoto and Kapoor, 2012; Itabashi et al., 2009; Crowder et al., 2015; Takagi  
313 et al., 2019). Finally, we note that the local force dissipation we observe in the spindle is  
314 a simple engineering principle by which a cellular structure may be mechanically robust,  
315 analogous to how structural engineers design sites of local force dissipation to make  
316 buildings and bridges robust to external forces.

317

## 318 **Acknowledgements**

319

320 We thank Le Paliulis for critical microneedle manipulation advice, and Alan Verkman's  
321 lab for the use of their microforge. We thank Alexey Khodjakov for the gift of PtK2 GFP-  
322  $\alpha$ -tubulin and PtK1 PA-GFP- $\alpha$ -tubulin cell lines and Jagesh Shah for the gift of the PtK2  
323 EYFP-Cdc20 cell line. We thank David Agard, Maya Anjur-Dietrich, Wallace Marshall,  
324 Tim Mitchison, Dave Morgan, Dan Needleman, Adair Oesterle, Ron Vale, Orion Weiner,  
325 and members of the Fred Chang and Dumont labs for helpful discussions.

326

327 This work was supported by NIH DP2GM119177, NIH R01GM134132, NSF CAREER  
328 1554139, the NSF Center for Cellular Construction DBI-1548297, the Rita Allen  
329 Foundation and Searle Scholars' Program (S.D.), NSF Graduate Research Fellowships  
330 (A.F.L. and P.S.) and a UCSF Moritz-Heyman Discovery Fellowship and UCSF Lloyd  
331 Kozloff Fellowship (A.F.L.).

332

333 The authors declare no competing financial interests.

334

### 335 **Author Contributions**

336

337 Conceptualization, A.F.L., P.S. and S.D.; Methodology, A.F.L., P.S.; Investigation,  
338 A.F.L. and P.S.; Data Curation, A.F.L. and P.S.; Software, A.F.L and P.S.; Writing –  
339 Original Draft, A.F.L.; Writing – Review and Editing, A.F.L, P.S. and S.D.; Visualization,  
340 A.F.L.; Funding Acquisition, S.D.

341

### 342 **Methods:**

343

#### 344 Cell culture

345 PtK2 cells were cultured in MEM (Invitrogen) supplemented with sodium pyruvate  
346 (Invitrogen), nonessential amino acids (Invitrogen), penicillin/streptomycin, and 10%  
347 qualified and heat-inactivated fetal bovine serum (Invitrogen) and maintained at 37°C  
348 and 5% CO<sub>2</sub>. PtK2 cells stably expressing human GFP- $\alpha$ -tubulin (gift from A.  
349 Khodjakov, Wadsworth Center) and PtK2 cells incubated with SiR-tubulin dye were both

350 used. PtK2 cells stably expressing human EYFP-Cdc20 (gift from Jagesh Shah,  
351 Harvard Medical School) were used for Fig. 1 validation of microneedle manipulation.  
352 SiR-tubulin (Cytoskeleton, Inc.) at 100nM and 10 $\mu$ M verapamil (Cytoskeleton, Inc.) were  
353 incubated with cells for 45 min prior to imaging for cells not expressing GFP-tubulin.  
354 PtK1 cells stably expressing PA-GFP tubulin (gift from A. Khodjakov) were cultured in  
355 F12 media (Invitrogen) supplemented with penicillin/streptomycin, and 10% qualified  
356 and heat-inactivated fetal bovine serum (Invitrogen) and maintained at 37°C and 5%  
357 CO<sub>2</sub>. For photoactivation experiments, PtK1 PA-GFP tubulin cells were co-labeled with  
358 SiR-tubulin as above to mark overall spindle structure. Control cells labeled with SiR-  
359 tubulin that did not undergo microneedle manipulation still exhibited chromosome  
360 oscillations and poleward microtubule flux at a rate of  $0.40 \pm 0.06 \mu\text{m}/\text{min}$  (Fig. 3C),  
361 indicating that this concentration and length of dye incubation did not suppress k-fiber  
362 microtubule dynamics in these cells.

363

#### 364 Microscopy

365 Live cells were imaged using an inverted microscope (Eclipse Ti-E; Nikon) with a  
366 spinning disk confocal (CSU-X1; Yokogawa Electric Corporation), head dichroic  
367 Semrock Di01-T405/488/568/647 for multicolor imaging, equipped with 405 nm (100  
368 mW), 488 nm (120mW), 561 nm (150mW), and 642 nm (100mW) diode lasers,  
369 emission filters ET455/50M, ET525/ 50M, ET630/75M and ET690/50M for multicolor  
370 imaging, and an iXon3 camera (Andor Technology) operated by MetaMorph (7.7.8.0;  
371 Molecular Devices). Cells were imaged with a 100x 1.45 Ph3 oil objective and 1.5x lens  
372 every 10 s acquiring 3 z-planes spaced 0.35 – 0.50  $\mu\text{m}$  apart with a PZ-2000 z-piezo



373 stage (ASI). Cells were imaged in a stage-top incubation chamber (Tokai Hit) with the  
374 top lid removed and maintained at 30°C. Cells were plated on glass-bottom 35mm  
375 dishes coated with poly-D-lysine (MatTek Corporation) and imaged in CO<sub>2</sub> independent  
376 MEM (Invitrogen) supplemented as for PtK2 cell culture as described above.  
377 Photoactivation was performed using a MicroPoint pulsed laser system (Andor) to  
378 deliver several 3-ns 20Hz pulses of 405nm light to activate PA-GFP-tubulin (Fig. 3).

379

### 380 Microneedle manipulation

381 Microneedle manipulation was adapted for use in mammalian spindles for sustained  
382 periods of many minutes by optimizing needle dimensions, contact geometry, and  
383 speed of motion to minimize cellular damage. Further microneedle manipulation details  
384 can be found in (Suresh et al., 2019).

385

### 386 *Preparation of microneedles:*

387 Glass capillaries with an inner and outer diameter of 1 mm and 0.58 mm respectively  
388 (1B100-4 and 1B100F-4, World Precision Instruments) were used to create  
389 microneedles using a pipette puller (P-87, Sutter Instruments, Novato, CA). For a ramp  
390 value of 504 (specific to the type of glass capillary and micropipette puller), we used the  
391 following settings: Heat = 509, Pull = 70, velocity = 45, delay = 90, pressure = 200,  
392 prescribed to generate microneedles of 0.2 μm outer tip diameter (Sutter Instruments  
393 Pipette Cookbook). The measured diameter of the microneedle in the z-plane of the  
394 manipulated k-fiber was 1.2 ± 0.1 μm (the tip was placed deeper than the k-fiber to  
395 ensure that it would not slip during movement). Microneedles with longer tapers and

396 smaller tips than above were more likely to rupture the cell membrane. Microneedles  
397 were bent ~1.5 mm away from their tip at a 45° angle using a microforge (Narishige  
398 International, Amityville, NY). This allowed for microneedles placed in the manipulator at  
399 a 45° angle to approach the cell vertically and minimize the overall surface area of  
400 contact between the microneedle and the cell membrane.

401       Microneedles used for manipulation were coated with BSA Alexa Fluor 647 (A-  
402 34785, Invitrogen) or 555 conjugate (A-34786, Invitrogen) by soaking in the solution for  
403 60 s before imaging (Sasaki et al., 2012): BSA-Alexa-647 and Sodium Azide (Nacalai  
404 Tesque, Kyoto, Japan) were dissolved in 0.1 M phosphate-buffered saline at the final  
405 concentration of 0.02% and 3 mM, respectively. Tip labeling was critical towards  
406 improving cell health during sustained manipulations because it allowed us to better  
407 visualize the microneedle tip in fluorescence along with the spindle and prevented us  
408 from going too deeply into the cell, thereby causing rupture.

409

#### 410 *Selection of cells:*

411 Cells for micromanipulation were chosen based on being at metaphase, being flat, with  
412 a spindle having two poles in the same focal plane. These criteria were important for  
413 pulling on single k-fibers close to the top of the cell and simultaneously being able to  
414 image the whole spindle's response over several minutes of manipulation. Cells were  
415 included in our datasets if they did not appear negatively affected by micromanipulation.  
416 We did not include cells that underwent sudden and continuous blebbing upon  
417 microneedle contact, cells with spindles that started to collapse during manipulation or  
418 cells with decondensed chromosomes.

419

420 *Manipulation:*

421 Manipulations were performed in 3D using an xyz stepper micromanipulator (MP-225  
422 Sutter Instruments). A 3-knob controller (ROE-200, Sutter Instruments) connected to the  
423 manipulator and controller (MPC-200, Sutter Instruments) allowed fine manual  
424 movements and was used to find and position the microneedle before imaging. To find  
425 and position the microneedle, we first located and centered the microneedle tip in the  
426 field of view using a low magnification objective (20X 0.5NA Ph1 air). We placed the  
427 microneedle in focus just above the coverslip before switching to a 100X 1.45 Ph3 oil  
428 objective and refined the xyz position of the microneedle to be right above a cell of  
429 interest, using the Ph1 phase ring to confirm microneedle position (phase ring mismatch  
430 visually highlights the position of the glass microneedle).

431       Upon choosing a cell to manipulate, we identified an outer k-fiber in a plane close  
432 to the top of the cell focused on this k-fiber. Then, we slowly brought the microneedle  
433 down into the cell using the fluorescent label of the microneedle tip to inform on its  
434 position until just deeper than the k-fiber of interest. If the microneedle's position was  
435 too far away from the k-fiber of interest, we slowly moved the microneedle out of the  
436 cell, adjusted its xy position and brought it back down into the cell. Through this iterative  
437 process, we could correctly position the microneedle such that it was inside the spindle,  
438 next to the outer k-fiber.

439       Once the microneedle was positioned next to an outer k-fiber near the top of the  
440 cell, it was moved in a direction that is roughly perpendicular ( $\sim 60^\circ$ - $90^\circ$ ) from the  
441 spindle's long axis using software (Multi-Link, Sutter Instruments). We wrote a custom

442 program to take as inputs the desired angle, duration, and distance for the microneedle  
443 movement and then output a set of instructions in steps, x, y positions, and delays for  
444 the Multi-Link software to achieve to desired movement. For all manipulations except  
445 those in Fig. 4E, we moved the microneedle at  $5.2 \pm 0.2 \mu\text{m}/\text{min}$  for  $3.1 \pm 0.3 \text{ min}$  (Fig.  
446 1B). For the ‘pull and hold’ experiments, we moved the microneedle at  $4.5 \pm 0.7 \mu\text{m}/\text{min}$   
447 for  $1.7 \pm 0.2 \text{ min}$  and then held in place until breakage (Fig. 4E). At the end of the  
448 manipulation the microneedle was manually removed from the cell in the z-axis slowly  
449 ( $<5 \mu\text{m}/\text{min}$ ) to avoid membrane rupture or cell detachment from the coverslip.

450

#### 451 Tracking of spindle features

452 For all analyses (Fig. 2-4), k-fibers were manually tracked in Fiji (version 2.0.0-rc-  
453 68/1.52g) (Schindelin et al., 2012) by drawing segmented lines along maximum intensity  
454 projections of three z planes of the fluorescent image with “spline fitting” checked.  
455 Splines were drawn from the edge of the tubulin signal at the plus-end to the center of  
456 the area of high tubulin intensity at the pole since we cannot determine specifically the  
457 location of the minus-end of the k-fiber. Spline x and y coordinates were saved in CSV  
458 files using a custom macro in Fiji and imported into Python. All subsequent analysis and  
459 plotting was performed in Python. Microneedle position was tracked using the mTrackJ  
460 plugin (Meijering et al., 2012) in Fiji using the “snap to bright centroid” feature and  
461 coordinates were saved in CSV files and imported into Python for further analysis.

462

#### 463 Quantification of spindle features

464 Pole and kinetochore position were calculated using the x and y coordinates of the point  
465 at the end of the spline that terminated at the pole and kinetochore, respectively. Time  $t$   
466 = 0 was set to the first frame after the start of microneedle movement. Pole,  
467 microneedle, and kinetochore speed were calculated using the average displacement of  
468 the ends of the spline or center of the microneedle position over time (Fig. 2D,H). K-  
469 fiber length and net growth rate were calculated using the length of the spline over time  
470 and with linear regression from the start and end of the manipulation (Fig. 2E-I). For the  
471 analysis of k-fiber growth rate of unmanipulated k-fibers specifically during the growth  
472 phase (Fig. 2G), the start and end points were selected manually when there were at  
473 least three consecutive timepoints where the k-fiber length increased. The distance  
474 between the microneedle and plus-end was calculated as the linear distance between  
475 the center of the microneedle centroid and the plus-end terminus of the spline (Fig. 2I).  
476 Microtubule 'splaying' was manually scored as the first frame in which new microtubule  
477 density appeared on the side of the k-fiber near the point of high curvature (Fig. 4B,F).  
478 These events occurred within one time point (<10s), thus their dynamics of appearance  
479 could not be carefully characterized under these imaging conditions. K-fiber breakage  
480 was manually scored as the first frame in which the two k-fiber pieces moved in an  
481 uncorrelated manner (Fig. 4B,E-G).

482

#### 483 Photomark analysis

484 For photomark analysis, splines were tracked on maximum intensity projections of three  
485 z-planes using the 647 channel (SiR-tubulin label) and then that spline with a thickness  
486 of 5 pixels was used to calculate the intensity in the 488 channel (PA-GFP tubulin) at

487 each point using a custom-written macro in Fiji, with all subsequent analysis in Python.  
488 Photomark position over time was calculated using the position along the curved k-fiber  
489 spline at which the maximum intensity value occurred after masking bright intensity  
490 directly at the pole that was separate from the photomark signal (Fig. 3C-E). Points  
491 were only included if the photomark remained in focus above background fluorescence.  
492 K-fiber intensity was normalized to the average intensity of the k-fiber in the timepoint  
493 prior to photomarking to identify the peak, however no intensity measurements were  
494 performed due to fluctuation of the k-fiber in the z-axis beyond the 3 z-planes  
495 measured. For calculation of photomark width (Fig. 3F), Gaussian fitting was performed  
496 on the normalized k-fiber intensities and the full-width at the half-maximal intensity  
497 (FWHM) was calculated using the width of the distribution ( $\sigma$ ) obtained from the fit, as  
498 per FWHM  $2\sqrt{2\ln 2} \sigma$  (Fig. 3G) for the subset of timepoints where the Gaussian function  
499 could fit the data.

500

#### 501 Curvature analysis

502 For curvature analysis (Fig. 4C,D), local radius of curvature ( $\mu\text{m}$ ) was calculated by  
503 inscribing a circle through three points spaced by an interval of  $1.5 \mu\text{m}$  along the spline  
504 using a custom Python script. This radius was used to calculate curvature ( $1/\mu\text{m}$ ) by  
505 taking the inverse.

506

#### 507 Video preparation

508 Videos were formatted for publication using Fiji and set to play at 15 frames per second.

509

510 Statistical analysis

511 Data are reported as mean  $\pm$  SEM where indicated. All statistical testing was performed  
512 using the Python SciPy statistical package in Python. Two-sided Mann-Whitney U  
513 testing was used to compare independent samples while Wilcoxon signed-rank tests  
514 were used to compare paired data sets since we did not test whether assumptions for  
515 normality were met due to low sample size. Correlations were examined by calculating  
516 the Spearman rank-order correlation coefficient and no outliers were removed. Due to  
517 the technical challenges of these experiments, sample sizes are small. We used  $p <$   
518 0.05 as the threshold for statistical significance and have directly indicated in the figure  
519 and figure legend the  $p$  value and  $n$ , where  $n$  refers to the number of cells. We have  
520 therefore not performed statistical analysis for experiments with  $n \leq 4$  (Fig. 3). No  
521 statistical methods were used to predetermine sample size. The experiments were not  
522 randomized.

523

524 **References:**

525

- 526 Agarwal, S., K.P. Smith, Y. Zhou, A. Suzuki, R.J. McKenney, and D. Varma. 2018. Cdt1  
527 stabilizes kinetochore–microtubule attachments via an Aurora B kinase–dependent  
528 mechanism. *J. Cell Biol.* 217:3446–3463. doi:10.1083/JCB.201705127.
- 529 Akiyoshi, B., K.K. Sarangapani, A.F. Powers, C.R. Nelson, S.L. Reichow, H. Arellano-  
530 Santoyo, T. Gonen, J.A. Ranish, C.L. Asbury, and S. Biggins. 2010. Tension  
531 directly stabilizes reconstituted kinetochore-microtubule attachments. *Nature*.  
532 468:576–579. doi:10.1038/nature09594.
- 533 Alushin, G.M., G.C. Lander, E.H. Kellogg, R. Zhang, D. Baker, and E. Nogales. 2014.  
534 High-Resolution microtubule structures reveal the structural transitions in  $\alpha\beta$ -tubulin  
535 upon GTP hydrolysis. *Cell*. 157:1117–1129. doi:10.1016/j.cell.2014.03.053.
- 536 Auckland, P., N.I. Clarke, S.J. Royle, and A.D. McAinsh. 2017. Congressing  
537 kinetochores progressively load Ska complexes to prevent force-dependent  
538 detachment. *J. Cell Biol.* 216:1623–1639. doi:10.1083/jcb.201607096.
- 539 Bakhoun, S.F., and D.A. Compton. 2012. Kinetochores and disease: Keeping  
540 microtubule dynamics in check! *Curr. Opin. Cell Biol.* 24:64–70.  
541 doi:10.1016/j.ceb.2011.11.012.

- 542 Begg, D.A., and G.W. Ellis. 1979. Micromanipulation studies of chromosome  
543 movement. I. Chromosome-Spindle Attachment and the Mechanical Properties of  
544 Chromosomal Spindle Fibers. *J. Cell Biol.* 82:542–554.
- 545 Betterton, M.D., and J.R. McIntosh. 2013. Regulation of chromosome speeds in mitosis.  
546 *Cell. Mol. Bioeng.* 6:418–430. doi:10.1007/s12195-013-0297-4.
- 547 De Brabander, M., G. Geuens, R. Nuydens, R. Willebrords, F. Aerts, J. De Mey, and  
548 J.R. McIntosh. 1986. Microtubule Dynamics during the Cell Cycle: The Effects of  
549 Taxol and Nocodazole on the Microtubule System of Pt K2 Cells at Different Stages  
550 of the Mitotic Cycle. *Int. Rev. Cytol.* 101:215–274. doi:10.1016/S0074-  
551 7696(08)60250-8.
- 552 Cassimeris, L., C.L. Rieder, G. Rupp, and E.D. Salmon. 1990. Stability of microtubule  
553 attachment to metaphase kinetochores in PtK1 cells. *J. Cell Sci.* 96:9–15.
- 554 Cassimeris, L., and E.D. Salmon. 1991. Kinetochores shorten by loss of  
555 subunits at the kinetochores of prometaphase chromosomes. *J. Cell Sci.* 98:151–  
556 158.
- 557 Cheerambathur, D.K., B. Prevo, N. Hattersley, L. Lewellyn, K.D. Corbett, K. Oegema,  
558 and A. Desai. 2017. Dephosphorylation of the Ndc80 Tail Stabilizes Kinetochores-  
559 Microtubule Attachments via the Ska Complex. *Dev. Cell.* 41:424–37.  
560 doi:10.1016/j.devcel.2017.04.013.
- 561 Cheeseman, I.M., and A. Desai. 2008. Molecular architecture of the kinetochores-  
562 microtubule interface. *Nat. Rev. Mol. Cell Biol.* 9:33–46. doi:10.1038/nrm2310.
- 563 Civelekoglu-Scholey, G., B. He, M. Shen, X. Wan, E. Roscioli, B. Bowden, and D.  
564 Cimini. 2013. Dynamic bonds and polar ejection force distribution explain  
565 kinetochores oscillations in PtK1 cells. *J. Cell Biol.* 201:577–93.  
566 doi:10.1083/jcb.201301022.
- 567 Crowder, M.E., M. Strzelecka, J.D. Wilbur, M.C. Good, G. Von Dassow, and R. Heald.  
568 2015. A comparative analysis of spindle morphometrics across metazoans. *Curr.*  
569 *Biol.* 25:1542–1550. doi:10.1016/j.cub.2015.04.036.
- 570 Dogterom, M., J.W.J. Kerssemakers, G. Romet-Lemonne, and M.E. Janson. 2005.  
571 Force generation by dynamic microtubules. *Curr. Opin. Cell Biol.* 17:67–74.  
572 doi:10.1016/j.ceb.2004.12.011.
- 573 Dumont, S., and T.J. Mitchison. 2009. Compression regulates mitotic spindle length by  
574 a mechanochemical switch at the poles. *Curr. Biol.* 19:1086–95.  
575 doi:10.1016/j.cub.2009.05.056.
- 576 Dumont, S., E.D. Salmon, and T.J. Mitchison. 2012. Deformations within moving  
577 kinetochores reveal different sites of active and passive force generation. *Science.*  
578 337:355–358. doi:10.1126/science.1221886.
- 579 Elting, M.W., C.L. Hueschen, D.B. Udy, and S. Dumont. 2014. Force on spindle  
580 microtubule minus ends moves chromosomes. *J. Cell Biol.* 206:245–256.  
581 doi:10.1083/jcb.201401091.
- 582 Elting, M.W., P. Suresh, and S. Dumont. 2018. The Spindle: Integrating Architecture  
583 and Mechanics across Scales. *Trends Cell Biol.* 28:896–910.  
584 doi:10.1016/j.tcb.2018.07.003.
- 585 Fong, K.K., K.K. Sarangapani, E.C. Yusko, M. Riffle, A. Llauro, B. Graczyk, T.N. Davis,  
586 and C.L. Asbury. 2017. Direct measurement of microtubule attachment strength to  
587 yeast centrosomes. *Mol. Biol. Cell.* 28:1853–61. doi:10.1091/mbc.E17-01-0034.



- 588 Franck, A.D., A.F. Powers, D.R. Gestaut, T. Gonen, T.N. Davis, and C.L. Asbury. 2007.  
589 Tension applied through the Dam1 complex promotes microtubule elongation  
590 providing a direct mechanism for length control in mitosis. *Nat. Cell Biol.* 9:832–7.  
591 doi:10.1038/ncb1609.
- 592 Ganem, N.J., and D.A. Compton. 2006. Functional Roles of Poleward Microtubule Flux  
593 During Mitosis. *Cell Cycle.* 5:481–485. doi:10.4161/cc.5.5.2519.
- 594 Ganem, N.J., K. Upton, and D.A. Compton. 2005. Efficient mitosis in human cells  
595 lacking poleward microtubule flux. *Curr. Biol.* 15:1827–32.  
596 doi:10.1016/j.cub.2005.08.065.
- 597 Gasic, I., and T.J. Mitchison. 2019. Autoregulation and repair in microtubule  
598 homeostasis. *Curr. Opin. Cell Biol.* 56:80–87. doi:10.1016/J.CEB.2018.10.003.
- 599 Gatlin, J.C., A. Matov, G. Danuser, T.J. Mitchison, and E.D. Salmon. 2010. Directly  
600 probing the mechanical properties of the spindle and its matrix. *J. Cell Biol.*  
601 188:481–9. doi:10.1083/jcb.200907110.
- 602 Gittes, F., B. Mickey, J. Nettleton, and J. Howard. 1993. Flexural rigidity of microtubules  
603 and actin filaments measured from thermal fluctuations in shape. *J. Cell Biol.*  
604 120:923–934. doi:10.1083/jcb.120.4.923.
- 605 Gorbsky, G.J., and G.G. Borisy. 1989. Microtubules of the kinetochore fiber turn over in  
606 metaphase but not in anaphase. *J. Cell Biol.* 109:653–662.  
607 doi:10.1083/jcb.109.2.653.
- 608 Grishchuk, E.L. 2017. Biophysics of Microtubule End Coupling at the Kinetochore. *In*  
609 *Centromeres and Kinetochores*. B.E. Black, editor. Springer. 397–428.
- 610 Grishchuk, E.L., M.I. Molodtsov, F.I. Ataullakhanov, and J.R. McIntosh. 2005. Force  
611 production by disassembling microtubules. *Nature.* 438:384–8.  
612 doi:10.1038/nature04132.
- 613 Guild, J., M.B. Ginzberg, C.L. Hueschen, T.J. Mitchison, and S. Dumont. 2017.  
614 Increased lateral microtubule contact at the cell cortex is sufficient to drive  
615 mammalian spindle elongation. *Mol. Biol. Cell.* 28:1975–1983.  
616 doi:10.1091/mbc.E17-03-0171.
- 617 Inoué, S., and E.D. Salmon. 1995. Force generation by microtubule  
618 assembly/disassembly in mitosis and related movements. *Mol. Biol. Cell.* 6:1619–  
619 1640. doi:10.1091/mbc.6.12.1619.
- 620 Itabashi, T., J. Takagi, Y. Shimamoto, H. Onoe, K. Kuwana, I. Shimoyama, J. Gaetz,  
621 T.M. Kapoor, and S. Ishiwata. 2009. Probing the mechanical architecture of the  
622 vertebrate meiotic spindle. *Nat. Methods.* 6:167–172. doi:10.1038/nmeth.1297.
- 623 Khodjakov, A., and C.L. Rieder. 1996. Kinetochores moving away from their associated  
624 pole do not exert a significant pushing force on the chromosome. *J. Cell Biol.*  
625 135:315–327. doi:10.1083/jcb.135.2.315.
- 626 Koshland, D.E., T.J. Mitchison, and M.W. Kirschner. 1988. Polewards chromosome  
627 movement driven by microtubule depolymerization in vitro. *Nature.* 331:499–504.  
628 doi:10.1038/331499a0.
- 629 Li, X., and R.B. Nicklas. 1995. Mitotic forces control a cell-cycle checkpoint. *Nature.*  
630 373:630–632. doi:10.1038/373630a0.
- 631 Lin, N.K.H., R. Nance, J. Szybist, A. Cheville, and L. V. Paliulis. 2018.  
632 Micromanipulation of Chromosomes in Insect Spermatocytes. *J. Vis. Exp.* e57359.  
633 doi:10.3791/57359.

- 634 Long, A.F., J. Kuhn, and S. Dumont. 2019. The mammalian kinetochore–microtubule  
635 interface: robust mechanics and computation with many microtubules. *Curr. Opin.*  
636 *Cell Biol.* 60:60–67. doi:10.1016/J.CEB.2019.04.004.
- 637 Long, A.F., D.B. Udy, S. Dumont, S. Dumont Correspondence, and S. Dumont. 2017.  
638 Hec1 Tail Phosphorylation Differentially Regulates Mammalian Kinetochore  
639 Coupling to Polymerizing and Depolymerizing Microtubules. *Curr. Biol.* 27:1692–  
640 1699. doi:10.1016/j.cub.2017.04.058.
- 641 Maddox, P., A. Straight, P. Coughlin, T.J. Mitchison, and E.D. Salmon. 2003. Direct  
642 observation of microtubule dynamics at kinetochores in *Xenopus* extract spindles:  
643 implications for spindle mechanics. *J. Cell Biol.* 162:377–382.  
644 doi:10.1083/jcb.200301088.
- 645 Matos, I., A.J. Pereira, M. Lince-Faria, L.A. Cameron, E.D. Salmon, and H. Maiato.  
646 2009. Synchronizing chromosome segregation by flux-dependent force equalization  
647 at kinetochores. *J. Cell Biol.* 186:11–26. doi:10.1083/jcb.200904153.
- 648 McDonald, K.L., E.T. O’Toole, D.N. Mastronarde, and J.R. McIntosh. 1992. Kinetochore  
649 microtubules in PTK cells. *J. Cell Biol.* 118:369–383. doi:10.1083/jcb.118.2.369.
- 650 McEwen, B.F., A.B. Heagle, G.O. Cassels, K.F. Buttle, and C.L. Rieder. 1997.  
651 Kinetochore fiber maturation in PtK1 cells and its implications for the mechanisms  
652 of chromosome congression and anaphase onset. *J. Cell Biol.* 137:1567–80.  
653 doi:10.1083/jcb.137.7.1567.
- 654 McNally, F.J., and A. Roll-Mecak. 2018. Microtubule-severing enzymes: From cellular  
655 functions to molecular mechanism. *J. Cell Biol.* 217:4057–4069.  
656 doi:10.1083/jcb.201612104.
- 657 Meijering, E., O. Dzyubachyk, and I. Smal. 2012. Methods for cell and particle tracking.  
658 *In* *Methods in Enzymology*. Academic Press Inc. 183–200.
- 659 Mitchison, T., L. Evans, E. Schulze, and M. Kirschner. 1986. Sites of microtubule  
660 assembly and disassembly in the mitotic spindle. *Cell.* 45:515–527.  
661 doi:10.1016/0092-8674(86)90283-7.
- 662 Mitchison, T.J. 1989. Polewards Microtubule Flux in the Mitotic Spindle : *J. Cell Biol.*  
663 109:637–652. doi:10.1083/jcb.109.2.637.
- 664 Monda, J.K., and I.M. Cheeseman. 2018. The kinetochore-microtubule interface at a  
665 glance. *J. Cell Sci.* 131. doi:10.1242/jcs.214577.
- 666 Nicklas, R.B. 1967. Chromosome micromanipulation. II. Induced reorientation and the  
667 experimental control of segregation in meiosis. *Chromosoma.* 21:17–50.
- 668 Nicklas, R.B. 1983. Measurements of the force produced by the mitotic spindle in  
669 anaphase. *J. Cell Biol.* 97:542–548. doi:10.1083/jcb.97.2.542.
- 670 Nicklas, R.B. 1988. The Forces that Move Chromosomes in Mitosis. *Ann. Rev. Biophys.*  
671 *Biophys. Chem.* 17:431–49. doi:10.1146/annurev.bb.17.060188.002243.
- 672 Nicklas, R.B. 1997. How cells get the right chromosomes. *Science.* 275:632–637.  
673 doi:10.1126/science.275.5300.632.
- 674 Nicklas, R.B., and C.A. Koch. 1969. Chromosome micromanipulation. 3. Spindle fiber  
675 tension and the reorientation of mal-oriented chromosomes. *J. Cell Biol.* 43:40–50.  
676 doi:10.1083/jcb.43.1.40.
- 677 Nicklas, R.B., D.F. Kubai, and T.S. Hays. 1982. Spindle Microtubules and Their  
678 Mechanical Associations after Micromanipulation in Anaphase. *J. Cell Biol.* 95:91–  
679 104. doi:10.1083/jcb.95.1.91.

- 680 Nicklas, R.B., G.M. Lee, C.L. Rieder, and G. Rupp. 1989. Mechanically cut mitotic  
681 spindles: clean cuts and stable microtubules. *J. Cell Sci.* 94 ( Pt 3):415–423.
- 682 Nicklas, R.B., and C.A. Staehly. 1967. Chromosome micromanipulation. I. The  
683 mechanics of chromosome attachment to the spindle. *Chromosoma.* 21:1–16.  
684 doi:10.1007/bf00330544.
- 685 Oriola, D., D.J. Needleman, and J. Brugués. 2018. The Physics of the Metaphase  
686 Spindle. *Annu. Rev. Biophys.* 47:655–73. doi:10.1146/annurev-biophys.
- 687 Paliulis, L. V, and R.B. Nicklas. 2004. Micromanipulation of Chromosomes Reveals that  
688 Cohesion Release during Cell Division Is Gradual and Does Not Require Tension.  
689 *Curr. Biol.* 14:2124–2129. doi:10.1016/j.cub.2004.11.052.
- 690 Portran, D., L. Schaedel, Z. Xu, M. Théry, and M.V. Nachury. 2017. Tubulin acetylation  
691 protects long-lived microtubules against mechanical ageing. *Nat. Cell Biol.* 19:391–  
692 398. doi:10.1038/ncb3481.
- 693 Rieder, C.L. 1981. The structure of the cold-stable kinetochore fiber in metaphase PtK1  
694 cells. *Chromosoma.* 84:145–158. doi:10.1007/BF00293368.
- 695 Sarangapani, K.K., B. Akiyoshi, N.M. Duggan, S. Biggins, and C.L. Asbury. 2013.  
696 Phosphoregulation promotes release of kinetochores from dynamic microtubules  
697 via multiple mechanisms. *Proc. Natl. Acad. Sci. U. S. A.* 110:7282–7287.  
698 doi:10.1073/pnas.1220700110.
- 699 Sarangapani, K.K., and C.L. Asbury. 2014. Catch and release: how do kinetochores  
700 hook the right microtubules during mitosis? *Trends Genet.* 30:150–159.  
701 doi:10.1016/j.tig.2014.02.004.
- 702 Sasaki, T., N. Matsuki, and Y. Ikegaya. 2012. Targeted axon-attached recording with  
703 fluorescent patch-clamp pipettes in brain slices. doi:10.1038/nprot.2012.061.
- 704 Schaedel, L., K. John, J. Gaillard, M. V. Nachury, L. Blanchoin, and M. Théry. 2015.  
705 Microtubules self-repair in response to mechanical stress. *Nat. Mater.* 14:1156–  
706 1163. doi:10.1038/nmat4396.
- 707 Schindelin, J., I. Arganda-Carreras, E. Frise, V. Kaynig, M. Longair, T. Pietzsch, S.  
708 Preibisch, C. Rueden, S. Saalfeld, B. Schmid, J.Y. Tinevez, D.J. White, V.  
709 Hartenstein, K. Eliceiri, P. Tomancak, and A. Cardona. 2012. Fiji: An open-source  
710 platform for biological-image analysis. *Nat. Methods.* 9:676–682.  
711 doi:10.1038/nmeth.2019.
- 712 Shimamoto, Y., and T.M. Kapoor. 2012. Microneedle-based analysis of the  
713 micromechanics of the metaphase spindle assembled in *Xenopus laevis* egg  
714 extracts. *Nat. Protoc.* 7:959–69. doi:10.1038/nprot.2012.033.
- 715 Sikirzhytski, V., V. Magidson, J.B. Steinman, J. He, M. Le Berre, I. Tikhonenko, J.G.  
716 Ault, B.F. McEwen, J.K. Chen, H. Sui, M. Piel, T.M. Kapoor, and A. Khodjakov.  
717 2014. Direct kinetochore-spindle pole connections are not required for chromosome  
718 segregation. *J. Cell Biol.* 206:231–243. doi:10.1083/jcb.201401090.
- 719 Skibbens, R. V., C.L. Rieder, and E.D. Salmon. 1995. Kinetochore motility after  
720 severing between sister centromeres using laser microsurgery: evidence that  
721 kinetochore directional instability and position is regulated by tension. *J. Cell Sci.*  
722 108:2537–2548.
- 723 Skibbens, R. V., and E.D. Salmon. 1997. Micromanipulation of chromosomes in mitotic  
724 vertebrate tissue cells: tension controls the state of kinetochore movement. *Exp.*  
725 *Cell Res.* 235:314–324. doi:10.1006/excr.1997.3691.

- 726 Spurck, T.P., O.G. Stonington, J.A. Snyder, J.D. Pickett-Heaps, A. Bajer, and J. Mole-  
727 Bajer. 1990. UV microbeam irradiations of the mitotic spindle. II. Spindle fiber  
728 dynamics and force production. *J. Cell Biol.* 111:1505–1518.  
729 doi:10.1083/jcb.111.4.1505.
- 730 Suresh, P., A.F. Long, and S. Dumont. 2019. Microneedle manipulation of the  
731 mammalian spindle reveals specialized, short-lived reinforcement near  
732 chromosomes. *BioRxiv*. doi:10.1101/843649.
- 733 Takagi, J., R. Sakamoto, G. Shiratsuchi, Y.T. Maeda, and Y. Shimamoto. 2019.  
734 Mechanically Distinct Microtubule Arrays Determine the Length and Force  
735 Response of the Meiotic Spindle. *Dev. Cell.* 49:267–278.  
736 doi:10.1016/j.devcel.2019.03.014.
- 737 Udy, D.B., M. Voorhies, P.P. Chan, T.M. Lowe, and S. Dumont. 2015. Draft De Novo  
738 Transcriptome of the Rat Kangaroo Potorous tridactylus as a Tool for Cell Biology.  
739 *PLoS One.* 10:e0134738. doi:10.1371/journal.pone.0134738.
- 740 Vemu, A., E. Szczesna, E.A. Zehr, J.O. Spector, N. Grigorieff, A.M. Deaconescu, and A.  
741 Roll-Mecak. 2018. Severing enzymes amplify microtubule arrays through lattice  
742 GTP-tubulin incorporation. *Science.* 361:eaau1504. doi:10.1126/science.aau1504.
- 743 Vladimirov, E., N. Mchedlishvili, I. Gasic, J.W. Armond, C.P. Samora, P. Meraldi, and  
744 A.D. McAinsh. 2013. Nonautonomous movement of chromosomes in mitosis. *Dev.*  
745 *Cell.* 27:60–71. doi:10.1016/j.devcel.2013.08.004.
- 746 Wan, X., D. Cimini, L.A. Cameron, and E.D. Salmon. 2012. The coupling between sister  
747 kinetochore directional instability and oscillations in centromere stretch in  
748 metaphase PtK1 cells. *Mol. Biol. Cell.* 23:1035–46. doi:10.1091/mbc.E11-09-0767.
- 749 Ward, J.J., H. Roque, C. Antony, and F. Nédélec. 2014. Mechanical design principles of  
750 a mitotic spindle. *eLife.* 3:e03398. doi:10.7554/eLife.03398.
- 751 Yoo, T.Y., J.-M. Choi, W. Conway, C.-H. Yu, R. V Pappu, and D.J. Needleman. 2018.  
752 Measuring NDC80 binding reveals the molecular basis of tension-dependent  
753 kinetochore-microtubule attachments. *eLife.* 7:e36392.  
754 doi:10.7554/eLife.36392.001.
- 755 Zhai, Y., P.J. Kronebusch, and G.G. Borisy. 1995. Kinetochore microtubule dynamics  
756 and the metaphase-anaphase transition. *J. Cell Biol.* 131:721–734.  
757 doi:10.1083/jcb.131.3.721.

758

759

760

761

762

763

764

765 **Figure Legends:**

766

767 **Figure 1. Microneedle manipulation of mammalian spindles enables sustained**  
768 **force application on k-fibers with spatial and temporal control.**

769 **A)** Cartoon representation of microneedle (yellow) placement (3D and cross-section) in  
770 a metaphase mammalian cell to exert sustained force on a k-fiber. **B)** Plot of linear  
771 microneedle displacement over time during manipulation in metaphase PtK cell (mean  $\pm$   
772 SEM, n = 18 cells). This approach allows smooth, reproducible pulls on single  
773 mammalian k-fibers. **C)** Representative z-stack reconstruction shows geometry of  
774 microneedle contact with the cell and metaphase spindle (GFP-tubulin, magenta) as  
775 diagrammed in **(A)**. The plasma membrane (CellMask Orange dye, cyan) locally  
776 deforms around the microneedle (Alexa-647, yellow) but does not alter whole cell shape  
777 or puncture the cell. Scale bar = 4  $\mu\text{m}$ . **D)** Representative timelapse images of  
778 microneedle (Alexa-555, yellow) manipulation to exert force on a k-fiber: it displaces the  
779 metaphase spindle (Cdc20-YFP, green; SiR-tubulin, magenta) and deforms the pulled  
780 k-fiber. Manipulated spindles typically progress to anaphase (here at 10:04). Scale bar =  
781 4  $\mu\text{m}$ . See also Video 1.

782

783 **Figure 2. Individual mammalian k-fibers switch to persistent lengthening in**

784 **response to sustained applied force. A)** Assay to locally exert force on an outer k-  
785 fiber using a microneedle (yellow circle) to probe its response to force (yellow arrow).  
786 Possible outcomes include global movement of the whole spindle and local deformation  
787 of the k-fiber, reflecting global and local dissipation of applied force, respectively. **B)**

788 Representative timelapse images of spindle and k-fiber (SiR-tubulin, white) movement  
789 and remodeling in response to sustained force from a microneedle (Alexa-555, yellow)  
790 as in Fig. 1B. The whole spindle rotates and translates while the k-fiber proximal to the  
791 microneedle (white line, tracked) bends and lengthens compared to a control k-fiber  
792 (red line, tracked). Scale bar = 4  $\mu\text{m}$ . See also Video 2. **C**) Maps of the tracked k-fiber  
793 shapes and positions for control and manipulated k-fibers from **(B)**. Open circles  
794 indicate plus-end positions and filled circles indicate pole positions. The manipulated k-  
795 fiber (right) translates in the XY plane and bends and lengthens over time; the control k-  
796 fiber (left) similarly translates but does not lengthen. **D**) Speed of proximal pole (left) and  
797 plus-end (kinetochore, right) movement relative to the speed of microneedle movement  
798 within a half-spindle. Half-spindle movement is positively correlated with microneedle  
799 speed, indicating global dissipation of force (pole: Spearman  $R = 0.48$ ,  $p = 0.04$ ; plus-  
800 end: Spearman  $R = 0.72$ ,  $p = 0.0007$ ,  $n = 18$  cells). **E**) K-fiber length as a function of  
801 time, normalized by subtracting the initial length at start of force application ( $t = 0$ ) for k-  
802 fibers manipulated (right, black,  $n = 18$  cells), in the middle of the half-spindle (middle,  
803 blue,  $n = 13$  cells), and on the opposite side of the half-spindle (left, red,  $n = 18$  cells).  
804 The micromanipulated k-fiber lengthens persistently during force application while the  
805 other k-fibers grow and shrink but don't systematically change length. **F**) Average k-fiber  
806 lengths at start and end of force application as a function of k-fiber position in the half-  
807 spindle. The manipulated k-fiber (black,  $n = 18$  cells) significantly increased in length ( $p$   
808 = 0.0002, Wilcoxon signed-rank test) while the middle and outer k-fiber lengths remain  
809 unchanged ( $p = 0.73$ ,  $n = 13$  cells and  $p = 0.35$ ,  $n = 18$  cells, Wilcoxon signed-rank test).  
810 Plot shows mean  $\pm$  SEM. **G**) Plot of average k-fiber growth rate for manipulated k-fibers

811 (black, n = 18 cells) compared to middle k-fibers (blue, n = 14 cells) or outer k-fibers  
812 (red, n = 18 cells) in the same half-spindle. Only the manipulated k-fiber lengthened  
813 significantly during force application while neighboring k-fibers continued oscillating  
814 between lengthening and shortening phases (manipulated k-fiber versus middle k-fiber  
815 'net',  $p = 1.6 \times 10^{-5}$ , manipulated k-fiber versus outer k-fiber 'net',  $p = 1.4 \times 10^{-5}$ , middle k-  
816 fiber 'net' compared to outer k-fiber, ( $p = 0.3$ , Mann-Whitney U test). The growth rate of  
817 the manipulated k-fiber was not significantly different than the growth rate of the middle  
818 k-fiber during just the growth phases of its oscillations (blue 'growth',  $p = 0.98$ , Mann-  
819 Whitney U test). Plot shows mean  $\pm$  SEM. **H)** Growth rate of the manipulated k-fiber as  
820 a function of the speed of microneedle movement. The growth rate of the manipulated  
821 k-fiber did not correlate with the speed of microneedle movement (Spearman  $R = 0.21$ ,  
822  $p = 0.46$ , n = 18 cells). **I)** Growth rate of the manipulated k-fiber as a function of distance  
823 between the microneedle center and the k-fiber plus-end. The growth rate of the  
824 manipulated k-fiber does not correlate with the proximity of the microneedle to the plus-  
825 end (Spearman  $R = 0.04$ ,  $p = 0.88$ , n = 18 cells).

826

827 **Figure 3. Force on individual mammalian k-fibers suppresses depolymerization at**  
828 **both ends without altering plus-end polymerization rates or inducing microtubule**  
829 **sliding. A)** Assay to determine the physical mechanism of k-fiber lengthening under  
830 force by tracking position of a photomark on the k-fiber during microneedle  
831 manipulation. Possible outcomes are shown, not mutually exclusive: the photomark  
832 could remain fixed relative to the pole indicating a suppression of minus-end  
833 depolymerization (left, blue 'X'), the position of the photomark to the kinetochore could

834 increase continuously, indicating a suppression of plus-end depolymerization or  
835 increase in plus-end polymerization rate (middle, blue 'X' or arrow), or the photomark  
836 could remain in a fixed position but widen, indicating sliding of microtubules within the k-  
837 fiber (right, blue 'X'). **B)** Representative timelapse images of photomark (PA-GFP  
838 tubulin, white) during microneedle (Alexa-555, yellow) manipulation of a k-fiber (SiR-  
839 tubulin, magenta). The distance between the photomark and the pole remains constant  
840 (orange line) while the distance between the photomark and plus-end increases (red  
841 line). Scale bar = 4  $\mu$ m. See also Video 3. **C)** Plot of the photomark to the pole distance  
842 change over time due to flux of microtubules in unmanipulated cells, as a baseline (n =  
843 4 cells). **D)** Plot of the photomark to pole distance change during microneedle  
844 manipulation, showing that photomark movement poleward due to microtubule  
845 depolymerization is suppressed (n = 4 cells). **E)** Plot of the photomark to plus-end  
846 position distance change during microneedle manipulation, showing that k-fibers  
847 persistently polymerize at their plus-ends under force (n = 4 cells). **F)** Representative  
848 example of photomark intensity linescans over time during manipulation, from same cell  
849 as **(B)**. **G)** Change in full-width at half-max photomark intensity at each timepoint during  
850 microneedle manipulation, showing that photomarks do not widen under force, and thus  
851 that there is no detectable microtubule sliding within the k-fiber (n = 4 cells).

852

853 **Figure 4. The interfaces between mammalian k-fibers and the kinetochore and**  
854 **pole are more robust than k-fiber bundles under sustained force. A)** Assay to  
855 probe how the k-fiber response to sustained force for minutes. Three example  
856 outcomes of force application (yellow arrow) are shown: the k-fiber could detach (purple



857 arrow) from the kinetochore (left), the k-fiber could detach (purple arrow) from the pole  
858 (middle), or the k-fiber could remain attached at its ends but break (purple arrows) in its  
859 center (right). **B)** Representative timelapse images of k-fiber (GFP-tubulin, white)  
860 bending, lengthening and breaking under sustained force. Before the k-fiber breaks,  
861 microtubules appear (insets) on the outside of the deformed k-fiber near the area of  
862 high curvature next to the microneedle (Alexa-647, yellow). The break creates new  
863 microtubule bundle plus-ends (purple arrowheads). Scale bar = 4  $\mu\text{m}$ . See also Video 4.  
864 **C)** Example map of local curvature ( $k$ ) along a k-fiber bundle during sustained  
865 microneedle manipulation. As the k-fiber bends over time, high curvature (dark red)  
866 increases near the microneedle and persists for many minutes before breakage occurs  
867 (3.5 min). Open circles indicate plus-end positions and filled circles indicate pole  
868 positions. **D)** Maximum curvature along the k-fiber in the last tracked timepoint before  
869 breakage in cells with breakage events (purple,  $n = 6$  cells) or at the end of the  
870 manipulation for cells with no breakage (black,  $n = 11$  cells, plot shows mean  $\pm$  SEM,  $p$   
871 = 0.37, Mann-Whitney U test). **E)** Cartoon of two different micromanipulation assays that  
872 lead to k-fiber breakage: (top, purple) microneedle is moved continuously at  $5.2 \pm 0.2$   
873  $\mu\text{m}/\text{min}$  for  $3.1 \pm 0.3$  minutes, (bottom, green) microneedle is moved at  $4.5 \pm 0.7$   $\mu\text{m}/\text{min}$   
874 for  $1.7 \pm 0.2$  min and then held in place until breakage. Plot showing no significant  
875 difference in the time at breakage in each assay (plot shows mean  $\pm$  SEM,  $n = 7$  cells  
876 and 4 cells,  $p = 0.15$ , Mann-Whitney U test). **F)** Plot of the average time to a splaying  
877 event (where newly visible microtubules appear near the area of high curvature) and  
878 average time to breakage for the subset of cells in which both events occurred. Splaying  
879 events occurred significantly before breakage events (plot shows mean  $\pm$  SEM,  $n = 9$

880 cells,  $p = 0.007$ , Wilcoxon signed-rank test). **G)** Example timelapse images of breakage  
881 event in which the newly created bundle plus-ends (lower purple arrow) are highly  
882 stable and persist for minutes after breakage. This example cell is the same as shown  
883 in Fig. 3B but here displaying the full response including breakage. See also Video 5.

884

885 **Figure 5. A model for local force dissipation by individual k-fibers to maintain**  
886 **robust mammalian spindle structure.** Using micromanipulation to apply sustained  
887 forces (yellow circle, arrow) on individual mammalian k-fibers reveals that they locally  
888 dissipate force (red circles) using different physical mechanisms over different  
889 timescales (blue ramp, dashed lines indicate microtubule turnover) to robustly preserve  
890 global spindle structure (gray box). Key to this model is how k-fibers both remodel under  
891 and resist sustained force. K-fibers *remodel* and locally dissipate force: they bend  
892 (second panel), lengthen through suppressing depolymerization at their plus- and  
893 minus-ends (third panel, small black 'off' arrows with red 'X'), and gradually break  
894 (fourth panel). In turn, k-fibers also *resist* force to preserve spindle structure: they do not  
895 increase their polymerization rate (small black 'on' arrows), slide their microtubules, or  
896 detach from kinetochores or poles under force. Note that for simplicity, we do not  
897 diagram whole spindle movements and only show individual microtubules for the  
898 manipulated k-fiber. Thus, local dissipation and isolation mechanisms together preserve  
899 mammalian spindle structure under sustained forces: the former limit how far and for  
900 how long forces can be transmitted across the spindle, while the latter limit the spindle's  
901 deformation rate and preserve k-fiber and spindle structure and their connections.  
902 Together, this model suggests local force dissipation as an engineering principle for the

903 dynamic spindle and other cellular machines to robustly maintain their structure and  
904 function under force.

905

906 **Video 1: Microneedle manipulation to exert sustained force on the mammalian k-**  
907 **fiber, Related to Figure 1**

908

909 Microneedle manipulation of individual k-fiber in metaphase PtK2 cell to probe how k-  
910 fibers dynamics and structure respond to sustained force. The microneedle (Alexa-555,  
911 yellow) exerts force for minutes and moves the spindle (kinetochores, Cdc20-YFP,  
912 green; tubulin, SiR-tubulin, magenta) and deforms k-fibers. Manipulated spindles  
913 typically progress to anaphase (here at 10:04). Scale bar = 4  $\mu\text{m}$ . Time in min:sec.

914 Video was collected using a spinning disk confocal microscope at 1 frame every 4 s.

915 Movie has been adjusted to play back at a constant rate of 15 frames per second.

916 Movie corresponds to still images from Fig. 1D.

917

918

919 **Video 2: K-fibers persistently lengthen under applied force, Related to Figure 2**

920

921 Microneedle manipulation of individual k-fiber in metaphase PtK2 cell results in k-fiber  
922 (SiR-tubulin, white) lengthening and spindle translation and rotation in response to  
923 force. The microneedle (Alexa-555, yellow) exerts force for minutes starting at  $t = 0$ .

924 Scale bar = 4  $\mu\text{m}$ . Time in min:sec. Video was collected using a spinning disk confocal

925 microscope at 1 frame every 10 s. Movie has been adjusted to play back at a constant  
926 rate of 15 frames per second. Movie corresponds to still images from Fig. 2B.

927

928 **Video 3: K-fiber lengthening under sustained force occurs by suppressing**  
929 **depolymerization at plus and minus-ends, Related to Figure 3**

930

931 Microneedle manipulation of individual k-fiber photomarked with PA-GFP-tubulin (white)  
932 in metaphase PtK1 cell reveals the mechanism of k-fiber lengthening under force. The  
933 microneedle (Alexa-555, yellow) exerts force on the k-fiber (SiR-tubulin, magenta) for  
934 minutes and the photomark remains a constant distance from the pole but a persistently  
935 increasing distance from the plus-end as the k-fiber lengthens, indicating a suppression  
936 of depolymerization at both ends. Scale bar = 4  $\mu\text{m}$ . Time in min:sec. Video was  
937 collected using a spinning disk confocal microscope at 1 frame every 10 s. Movie has  
938 been adjusted to play back at a constant rate of 15 frames per second. Movie  
939 corresponds to still images from Fig. 3B.

940

941 **Video 4: K-fiber breakage occurs under sustained force for minutes, Related to**  
942 **Figure 4**

943

944 Microneedle manipulation of individual k-fiber for minutes reveals k-fiber breakage  
945 instead of detachment from the kinetochore or pole. The microneedle (Alexa-555,  
946 yellow) exerts force on the k-fiber (GFP-tubulin, white) for minutes and the k-fiber  
947 bends, lengthens, and ultimately breaks in two. Scale bar = 4  $\mu\text{m}$ . Time in min:sec.

948 Video was collected using a spinning disk confocal microscope at 1 frame every 10 s.

949 Movie has been adjusted to play back at a constant rate of 15 frames per second.

950 Movie corresponds to still images from Fig. 4B.

951

952

953 **Video 5: New k-fiber plus-ends can be stabilized after k-fiber breakage, Related to**

954 **Figure 4**

955

956 Microneedle manipulation of individual k-fiber reveals an example of stabilized bundle

957 plus-ends after k-fiber breakage. The microneedle (Alexa-555, yellow) exerts force on

958 the k-fiber (SiR-tubulin, white) for minutes and is removed after the k-fiber breaks

959 (purple arrowheads). The new plus-end fragment of the bundle persists for minutes

960 while the fragment attached to the kinetochore is reincorporated into the spindle. This

961 video shows the later timepoints and response of the cell from Video 3 where  $t = 0$  is the

962 start of microneedle manipulation. Scale bar = 4  $\mu\text{m}$ . Time in min:sec. Video was

963 collected using a spinning disk confocal microscope at 1 frame every 10 s. Movie has

964 been adjusted to play back at a constant rate of 15 frames per second. Movie

965 corresponds to still images from Fig. 4G.

966

967

968

969

970

971

972

973

974

975

Figure 1

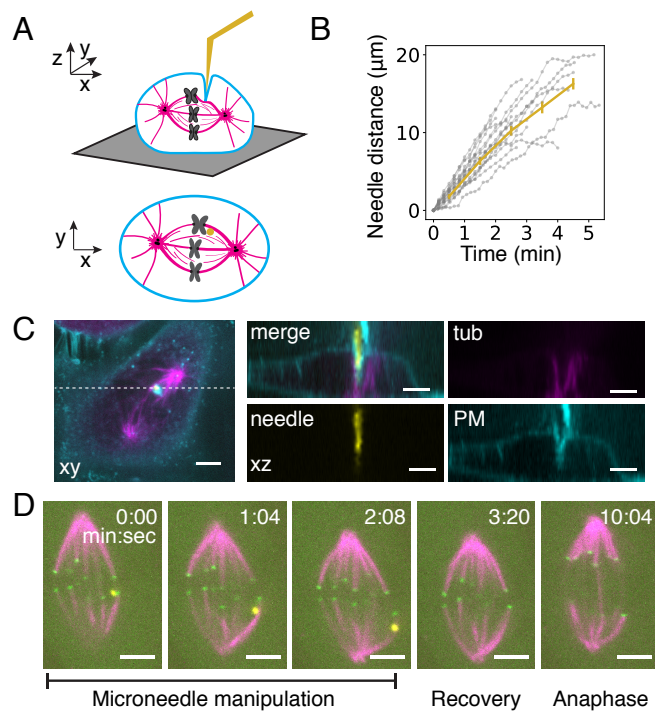

Figure 2

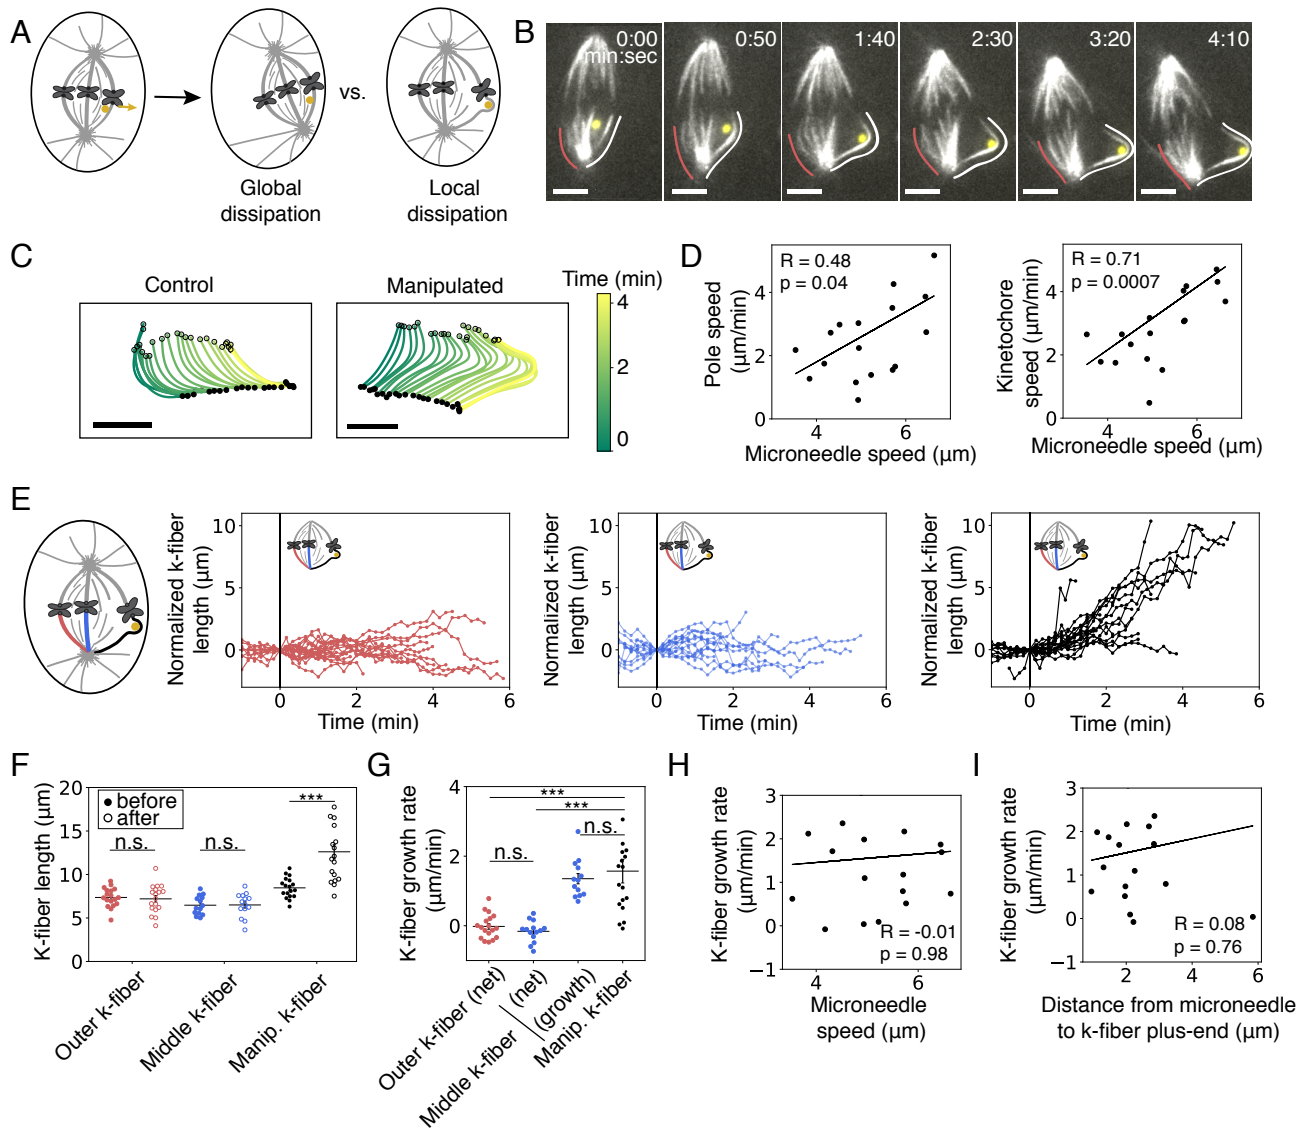

Figure 3

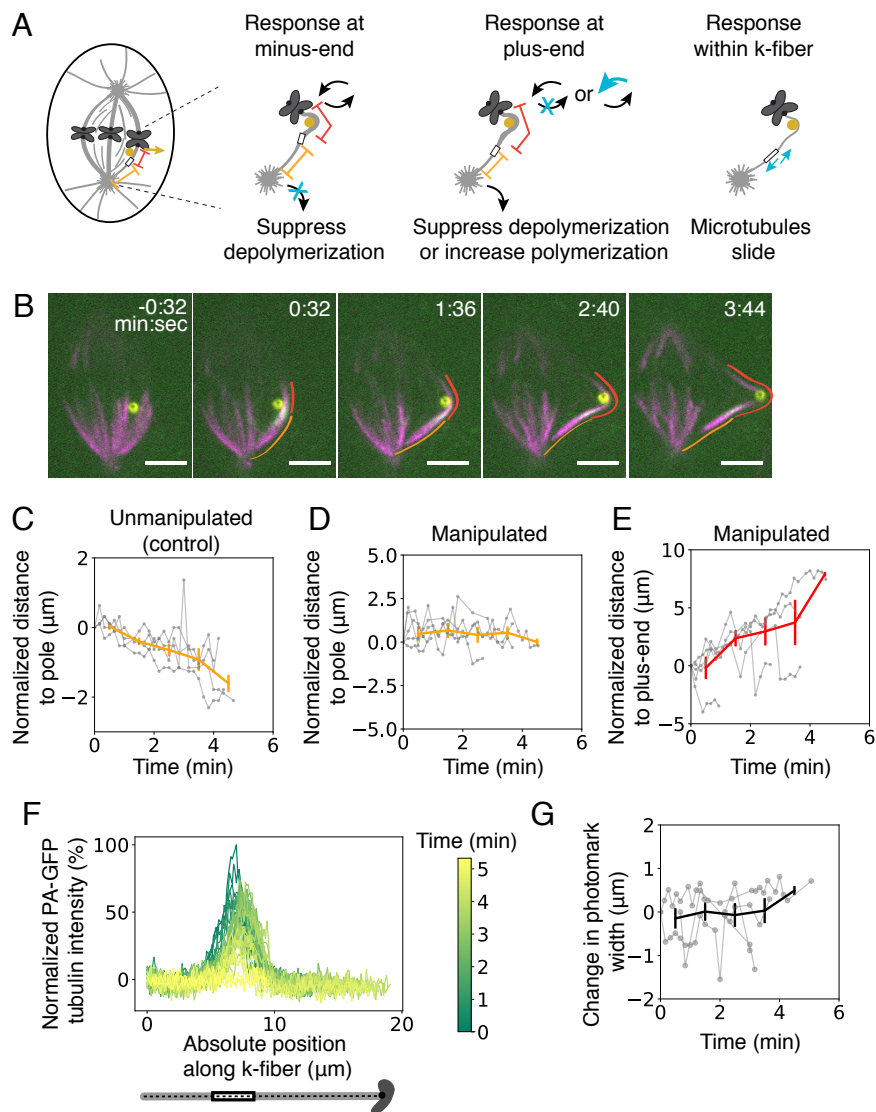



Figure 4

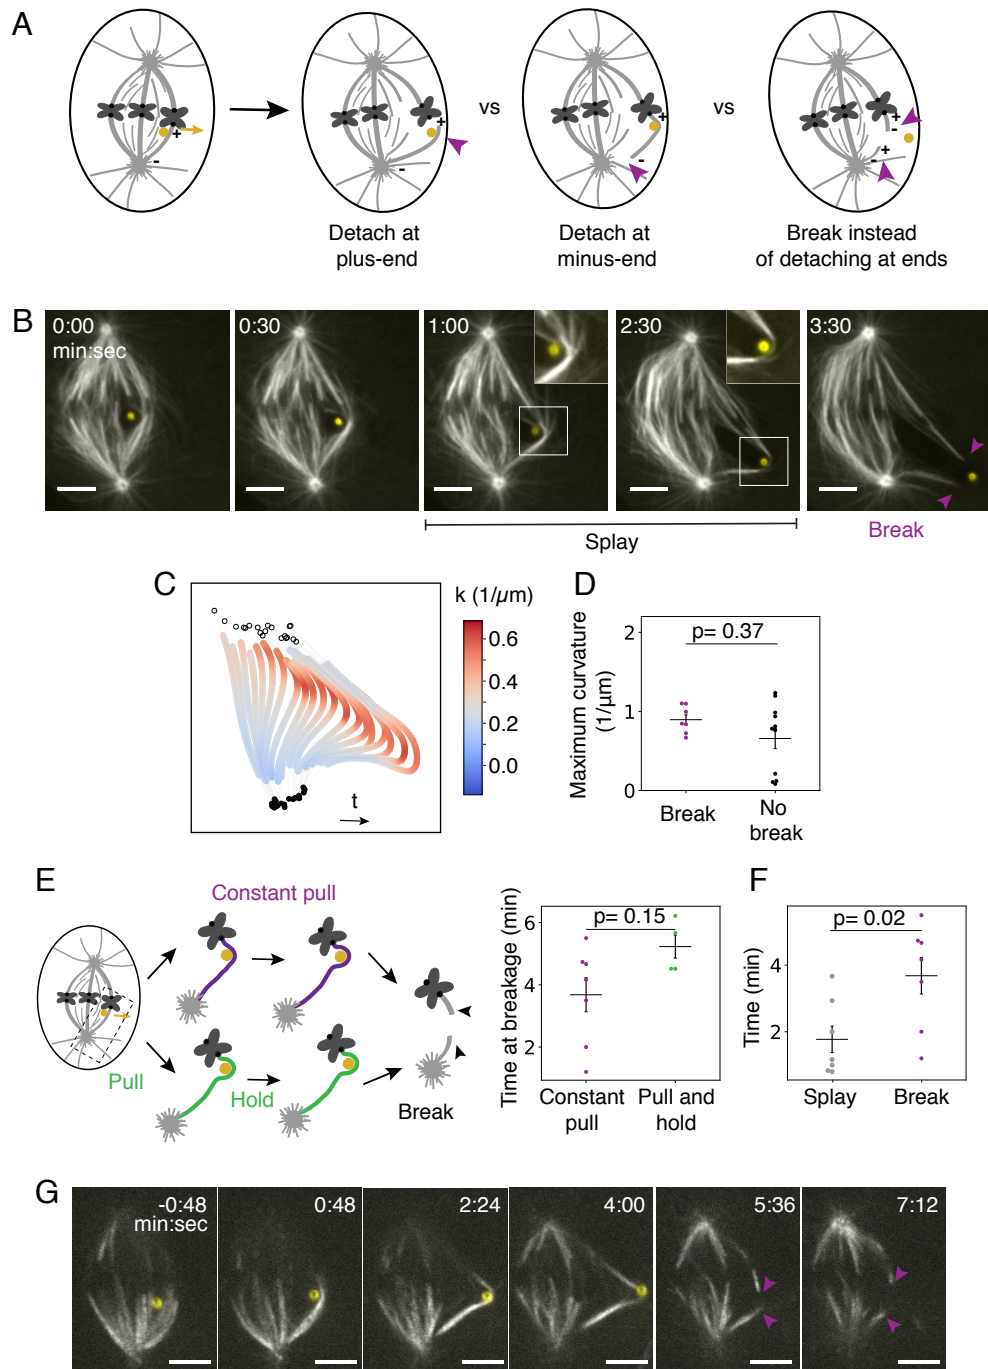

Figure 5

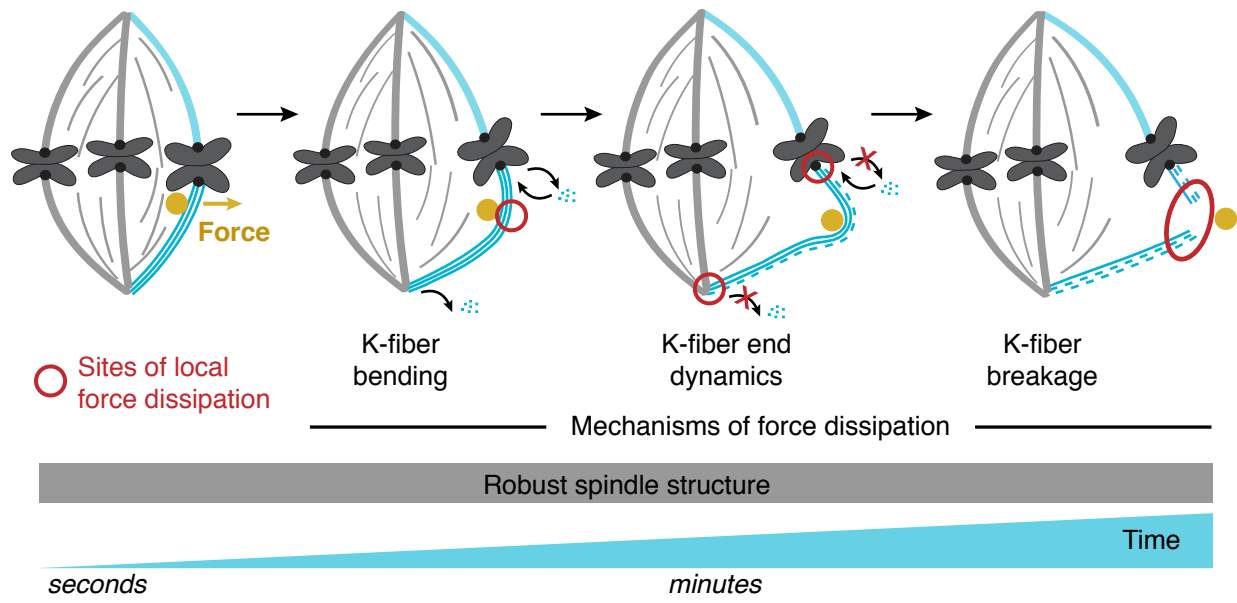

Source: https://www.biorxiv.org/content/10.1101/846154v1.full.pdf
